# Supplementary material for: EST-based in silico identification and in vitro test of antimicrobial peptides in Brassica napus
Source: BMC Genomics. 2015 Sep 2;16(1):653. doi: 10.1186/s12864-015-1849-x (PMC4557752; doi:10.1186/s12864-015-1849-x)
Supplement: Additional file 1: — Blast result of four B. napus ESTs dataset against to known AMPs. (XLSX 85 kb) [file 12864_2015_1849_MOESM1_ESM.xlsx]

## Sheet: Sheet1
unigene name	Letter	QueryX	QueryY	SbjctX	SbjctY	Length	Score	E value	Overlap/total	Identity	Sbject Name
PUT223148620	704	232	420	4	66	66	124	3e-32	51/63	80	AP00992
PUT231148620	809	160	348	4	66	66	124	3e-32	51/63	80	AP00992
PUT231148621	749	102	290	4	66	66	124	3e-32	51/63	80	AP00992
PUT37355	684	217	405	4	66	66	124	3e-32	51/63	80	AP00992
PUT89858	445	402	214	4	66	66	124	3e-32	51/63	80	AP00992
PUT103463	512	131	283	1	51	51	123	6e-32	51/51	100	AP00286
PUT103465	628	153	305	1	51	51	123	6e-32	51/51	100	AP00286
PUT103466	525	185	337	1	51	51	123	6e-32	51/51	100	AP00286
PUT103611	460	150	302	1	51	51	123	6e-32	51/51	100	AP00286
PUT103610	425	138	290	1	51	51	123	7e-32	51/51	100	AP00286
PUT64148613	490	170	322	1	51	51	123	7e-32	51/51	100	AP00286
PUT73148615	417	137	289	1	51	51	123	7e-32	51/51	100	AP00286
PUT13180	525	151	303	1	51	51	122	2e-31	50/51	98	AP00287
PUT32386	734	574	726	1	51	51	122	2e-31	50/51	98	AP00287
PUT53059	633	119	271	1	51	51	122	2e-31	50/51	98	AP00287
PUT37784	636	334	528	2	66	66	121	3e-31	48/65	73	AP00992
PUT74093	506	188	373	5	66	66	121	3e-31	50/62	80	AP00992
PUT64148614	554	138	290	1	51	51	120	6e-31	50/51	98	AP00286
PUT18225	364	48	197	2	51	51	120	7e-31	49/50	98	AP00287
PUT111148621	1177	753	938	5	66	66	119	9e-31	49/62	79	AP00992
PUT13250	446	148	300	1	51	51	119	2e-30	49/51	96	AP00287
PUT56331	1096	666	851	5	66	66	119	2e-30	48/62	77	AP00992
PUT103605	490	141	290	2	51	51	118	3e-30	48/50	96	AP00286
PUT91917	641	199	378	4	63	63	117	4e-30	45/60	75	AP00991
PUT91948	590	224	403	4	63	63	117	5e-30	45/60	75	AP00991
PUT121112	420	115	267	1	51	51	117	6e-30	49/51	96	AP00286
PUT113699	409	94	243	2	51	51	115	1e-29	47/50	94	AP00287
PUT68506	646	255	434	4	63	63	115	1e-29	44/60	73	AP00991
PUT375148621	1359	465	286	4	63	63	114	3e-29	45/60	75	AP00991
PUT416148614	815	435	614	4	63	63	114	3e-29	45/60	75	AP00991
PUT28417	547	151	303	1	51	51	114	4e-29	47/51	92	AP00286
PUT43268	815	225	377	1	51	51	114	4e-29	47/51	92	AP00286
PUT103612	305	21	173	1	51	51	114	5e-29	48/51	94	AP00286
PUT449148617	1194	260	439	4	63	63	113	7e-29	45/60	75	AP00991
PUT448148612	609	202	381	4	63	63	113	8e-29	45/60	75	AP00991
PUT64281	526	146	295	2	51	51	113	8e-29	46/50	92	AP00287
PUT103608	317	28	174	3	51	51	112	1e-28	47/49	95	AP00286
PUT32842	444	121	270	2	51	51	112	1e-28	46/50	92	AP00287
PUT83988	579	211	390	4	63	63	112	1e-28	44/60	73	AP00991
PUT83989	592	208	387	4	63	63	112	1e-28	44/60	73	AP00991
PUT84040	570	204	383	4	63	63	112	1e-28	44/60	73	AP00991
PUT106673	721	549	370	5	63	63	112	2e-28	47/60	78	AP00991
PUT106674	766	374	553	5	63	63	112	2e-28	47/60	78	AP00991
PUT134366	798	220	372	1	51	51	110	4e-28	46/51	90	AP00286
PUT36927	692	220	411	2	63	63	110	8e-28	47/64	73	AP00991
PUT36956	549	258	440	5	63	63	109	1e-27	46/61	75	AP00991
PUT129366	585	234	413	7	66	66	108	2e-27	43/60	71	AP00992
PUT139376	609	269	448	7	66	66	108	2e-27	43/60	71	AP00992
PUT106733	447	117	296	5	63	63	107	3e-27	46/60	76	AP00991
PUT17809	595	233	412	4	63	63	107	5e-27	40/60	66	AP00991
PUT66148621	580	204	392	2	63	63	106	1e-26	45/63	71	AP00991
PUT70069	700	291	470	5	63	63	105	2e-26	44/60	73	AP00991
PUT115496	528	154	291	1	46	46	104	3e-26	42/46	91	AP00483
PUT45148620	702	198	383	5	66	66	104	4e-26	42/62	67	AP00992
PUT106522	354	49	207	11	63	63	103	7e-26	41/53	77	AP00991
PUT101748	416	204	383	4	63	63	102	1e-25	41/60	68	AP00991
PUT64989	534	353	174	5	63	63	102	1e-25	43/60	71	AP00991
PUT65149	508	183	368	5	66	66	102	2e-25	43/62	69	AP00992
PUT123065	432	171	290	12	51	51	95.9	9e-25	39/40	97	AP00287
PUT139370	211	33	209	4	62	63	99.4	1e-24	39/59	66	AP00991
PUT108037	580	102	254	1	51	51	99	2e-24	38/51	74	AP00287
PUT108095	547	94	246	1	51	51	99	2e-24	38/51	74	AP00287
PUT133488	184	184	56	9	51	51	99	2e-24	40/43	93	AP00286
PUT109383	795	404	255	1	50	51	97.8	4e-24	41/50	82	AP00286
PUT132755	461	190	375	5	66	66	97.8	4e-24	39/62	62	AP00992
PUT39635	324	133	282	2	51	51	97.1	6e-24	40/50	80	AP00287
PUT98393	502	117	257	4	50	51	95.1	3e-23	40/47	85	AP00287
PUT128621	573	523	254	1	88	90	94.4	4e-23	45/90	50	AP01245
PUT22997	479	151	330	5	63	63	94.4	4e-23	39/60	65	AP00991
PUT110552	341	50	178	9	51	51	92.4	1e-22	39/43	90	AP00286
PUT127064	745	179	445	1	88	90	92.8	1e-22	45/90	50	AP01245
PUT127564	763	596	330	1	88	90	92.8	1e-22	45/90	50	AP01245
PUT136148620	1229	229	495	1	88	90	92.8	1e-22	45/90	50	AP01245
PUT145314	999	569	303	1	88	90	92.8	1e-22	45/90	50	AP01245
PUT145377	881	488	222	1	88	90	92.8	1e-22	45/90	50	AP01245
PUT146039	743	153	419	1	88	90	92.8	1e-22	45/90	50	AP01245
PUT147757	665	183	449	1	88	90	92.8	1e-22	45/90	50	AP01245
PUT148104	1219	533	267	1	88	90	92.8	1e-22	45/90	50	AP01245
PUT289148613	2144	662	928	1	88	90	92.8	1e-22	45/90	50	AP01245
PUT291148621	827	109	375	1	88	90	92.8	1e-22	45/90	50	AP01245
PUT55148613	716	160	426	1	88	90	92.8	1e-22	45/90	50	AP01245
PUT22148619	1832	562	296	1	88	90	92.8	2e-22	45/90	50	AP01245
PUT23147	197	122	3	1	40	51	91.7	3e-22	39/40	97	AP00286
PUT294148619	1173	711	977	2	90	90	90.9	4e-22	46/90	51	AP01245
PUT292148612	562	453	187	1	88	90	90.9	5e-22	44/90	48	AP01245
PUT117790	336	56	190	20	63	63	90.1	8e-22	37/45	82	AP00991
PUT70232	287	271	137	20	63	63	90.1	8e-22	37/45	82	AP00991
PUT103426	507	158	298	1	47	47	89.7	1e-21	34/47	72	AP01330
PUT103477	716	188	328	1	47	47	89.7	1e-21	34/47	72	AP01330
PUT103478	500	158	298	1	47	47	89.7	1e-21	34/47	72	AP01330
PUT126151	766	182	448	1	88	90	89.7	1e-21	43/90	47	AP01245
PUT127696	767	207	473	1	88	90	89.7	1e-21	43/90	47	AP01245
PUT127710	702	555	289	1	88	90	89.7	1e-21	43/90	47	AP01245
PUT131148618	850	408	680	1	88	90	89.4	1e-21	43/91	47	AP01245
PUT131148621	847	552	824	1	88	90	89.4	1e-21	43/91	47	AP01245
PUT143407	777	244	510	1	88	90	89.7	1e-21	43/90	47	AP01245
PUT144116	1052	216	482	1	88	90	89.7	1e-21	43/90	47	AP01245
PUT144645	1108	228	494	1	88	90	89.7	1e-21	43/90	47	AP01245
PUT145441	738	533	267	1	88	90	89.7	1e-21	43/90	47	AP01245
PUT145840	902	535	269	1	88	90	89.7	1e-21	43/90	47	AP01245
PUT147126	1065	582	319	2	88	90	89.7	1e-21	41/89	46	AP01245
PUT148032	604	115	381	1	88	90	89.7	1e-21	43/90	47	AP01245
PUT24102	542	157	297	1	47	47	89.7	1e-21	34/47	72	AP01330
PUT49148620	673	104	376	1	88	90	89.4	1e-21	43/91	47	AP01245
PUT127004	576	110	376	2	90	90	89	2e-21	45/90	50	AP01245
PUT127675	706	134	400	2	90	90	89	2e-21	45/90	50	AP01245
PUT128398	645	130	396	2	90	90	89	2e-21	45/90	50	AP01245
PUT131148619	754	421	693	1	88	90	89.4	2e-21	43/91	47	AP01245
PUT146035	505	361	95	2	90	90	89	2e-21	45/90	50	AP01245
PUT147947	529	105	371	2	90	90	89	2e-21	45/90	50	AP01245
PUT34390	695	136	399	1	88	90	88.6	2e-21	43/89	48	AP01245
PUT42747	377	5	265	1	90	90	88.6	2e-21	44/90	48	AP01245
PUT49148621	1799	842	1114	1	88	90	89.4	2e-21	43/91	47	AP01245
PUT499148618	631	140	406	2	90	90	89	2e-21	45/90	50	AP01245
PUT509148618	779	193	459	2	90	90	89	2e-21	45/90	50	AP01245
PUT147029	358	9	278	2	88	90	88.2	3e-21	42/90	46	AP01245
PUT134034	746	180	449	1	89	90	87.8	4e-21	44/91	48	AP01245
PUT128455	1292	523	251	1	88	90	87.4	5e-21	42/91	46	AP01245
PUT143333	738	201	467	1	88	90	87.4	6e-21	42/90	46	AP01245
PUT27827	744	194	454	1	90	90	87.4	6e-21	42/90	46	AP01245
PUT92901	488	160	420	1	90	90	87	7e-21	42/90	46	AP01245
PUT92816	756	187	447	1	90	90	87	8e-21	42/90	46	AP01245
PUT109690	655	170	433	1	88	90	86.3	1e-20	42/89	47	AP01245
PUT118346	1409	153	416	1	88	90	86.3	1e-20	43/89	48	AP01245
PUT118414	401	132	395	1	88	90	86.3	1e-20	43/89	48	AP01245
PUT118417	822	129	392	1	88	90	86.3	1e-20	43/89	48	AP01245
PUT127345	1131	139	405	1	88	90	86.3	1e-20	43/89	48	AP01245
PUT63131	858	162	425	1	88	90	86.3	1e-20	42/89	47	AP01245
PUT65013	577	153	290	1	46	47	86.3	1e-20	33/46	71	AP01330
PUT9567	818	502	236	2	90	90	86.3	1e-20	43/90	47	AP01245
PUT145888	503	94	360	1	88	90	85.5	2e-20	40/89	44	AP01245
PUT34895	422	161	418	2	90	90	85.9	2e-20	41/89	46	AP01245
PUT45148619	643	309	166	19	66	66	85.5	2e-20	34/48	70	AP00992
PUT520148613	998	120	386	1	88	90	85.5	2e-20	40/89	44	AP01245
PUT520148614	894	113	379	1	88	90	85.5	2e-20	40/89	44	AP01245
PUT520148615	878	119	385	1	88	90	85.5	2e-20	40/89	44	AP01245
PUT520148617	1135	169	435	1	88	90	85.5	2e-20	40/89	44	AP01245
PUT520148618	982	166	432	1	88	90	85.5	2e-20	40/89	44	AP01245
PUT521148620	1013	473	207	1	88	90	85.5	2e-20	40/89	44	AP01245
PUT522148613	975	585	319	1	88	90	85.5	2e-20	40/89	44	AP01245
PUT522148616	879	452	186	1	88	90	85.5	2e-20	40/89	44	AP01245
PUT54148621	996	206	472	1	88	90	85.5	2e-20	40/89	44	AP01245
PUT55148612	738	216	482	1	88	90	85.5	2e-20	40/89	44	AP01245
PUT601148617	1124	469	200	1	88	90	85.5	2e-20	43/91	47	AP01245
PUT141068	520	139	405	1	88	90	84.3	4e-20	41/90	45	AP01245
PUT146834	1044	600	334	1	88	90	84.7	4e-20	40/89	44	AP01245
PUT520148620	434	140	406	1	88	90	84.3	4e-20	39/89	43	AP01245
PUT519148617	1176	196	462	1	88	90	84	5e-20	41/89	46	AP01245
PUT519148618	1149	154	420	1	88	90	84	5e-20	41/89	46	AP01245
PUT521148617	770	462	196	1	88	90	84.3	5e-20	39/89	43	AP01245
PUT54148618	632	139	405	1	88	90	84	5e-20	41/89	46	AP01245
PUT121086	324	324	82	6	88	90	84	6e-20	40/83	48	AP01245
PUT144700	575	134	400	1	88	90	84	6e-20	41/89	46	AP01245
PUT172148620	592	114	383	1	88	90	84	6e-20	41/91	45	AP01245
PUT518148618	564	133	399	1	88	90	84	6e-20	41/89	46	AP01245
PUT519148612	897	124	390	1	88	90	84	6e-20	41/89	46	AP01245
PUT519148613	921	111	377	1	88	90	84	6e-20	41/89	46	AP01245
PUT519148621	907	111	377	1	88	90	84	6e-20	41/89	46	AP01245
PUT521148612	473	11	277	1	88	90	84	6e-20	41/89	46	AP01245
PUT68802	598	256	438	7	66	66	84	6e-20	35/61	57	AP00992
PUT127937	968	163	429	1	88	90	84	7e-20	41/89	46	AP01245
PUT518148619	789	234	500	1	88	90	84	7e-20	41/89	46	AP01245
PUT518148621	1057	212	478	1	88	90	84	7e-20	41/89	46	AP01245
PUT519148616	1096	206	472	1	88	90	84	7e-20	41/89	46	AP01245
PUT519148620	1062	207	473	1	88	90	84	7e-20	41/89	46	AP01245
PUT521148614	1033	490	224	1	88	90	84	7e-20	41/89	46	AP01245
PUT54148619	970	169	435	1	88	90	84	7e-20	41/89	46	AP01245
PUT146960	1065	588	322	1	88	90	83.6	9e-20	39/89	43	AP01245
PUT143419	557	109	375	1	88	90	83.2	1e-19	40/90	44	AP01245
PUT143738	616	104	373	1	89	90	82.8	1e-19	40/91	43	AP01245
PUT146841	496	102	374	1	88	90	82.8	1e-19	39/91	42	AP01245
PUT520148619	626	138	404	1	88	90	82.8	1e-19	42/89	47	AP01245
PUT92815	1227	456	196	1	90	90	82.8	1e-19	41/90	45	AP01245
PUT132869	1071	664	849	6	66	66	82.4	2e-19	35/62	56	AP00992
PUT134458	649	127	393	1	88	90	82.4	2e-19	40/90	44	AP01245
PUT134459	813	231	497	1	88	90	82.4	2e-19	40/90	44	AP01245
PUT146744	400	117	386	1	88	90	82	2e-19	40/91	43	AP01245
PUT26148615	1281	438	172	1	88	90	82	2e-19	41/91	45	AP01245
PUT521148618	1178	543	277	1	88	90	82.4	2e-19	40/89	44	AP01245
PUT144741	513	59	298	10	88	90	81.6	3e-19	39/81	48	AP01245
PUT24040	494	286	110	5	63	63	81.6	3e-19	31/59	52	AP00991
PUT51820	526	88	351	1	88	90	81.6	3e-19	42/89	47	AP01245
PUT522148612	852	485	219	1	88	90	81.6	3e-19	39/89	43	AP01245
PUT16735	1065	679	867	5	66	66	80.9	6e-19	34/63	53	AP00992
PUT16794	777	387	199	5	66	66	80.9	6e-19	34/63	53	AP00992
PUT91366	654	117	377	2	88	90	80.5	6e-19	37/88	42	AP01245
PUT91712	818	205	465	2	88	90	80.5	6e-19	37/88	42	AP01245
PUT91714	825	212	472	2	88	90	80.5	6e-19	37/88	42	AP01245
PUT91716	834	223	483	2	88	90	80.5	6e-19	37/88	42	AP01245
PUT146637	900	485	219	1	88	90	80.5	7e-19	39/90	43	AP01245
PUT91368	760	146	406	2	88	90	80.5	7e-19	37/88	42	AP01245
PUT124359	468	104	250	2	50	50	80.1	8e-19	30/49	61	AP00918
PUT126158	540	74	316	9	88	90	80.1	8e-19	38/82	46	AP01245
PUT518148620	1074	207	473	1	88	90	80.5	8e-19	40/89	44	AP01245
PUT522148615	1042	486	220	1	88	90	80.5	8e-19	40/89	44	AP01245
PUT57086	386	138	287	2	51	51	80.1	8e-19	34/50	68	AP00286
PUT91362	1019	397	657	2	88	90	80.5	8e-19	37/88	42	AP01245
PUT146510	1274	594	328	1	88	90	80.1	9e-19	39/90	43	AP01245
PUT35873	720	152	412	1	90	90	80.1	9e-19	39/90	43	AP01245
PUT81855	505	110	256	2	50	50	80.1	9e-19	30/49	61	AP00918
PUT107498	472	185	361	5	63	63	79.7	1e-18	30/59	50	AP00991
PUT521148613	678	567	301	1	88	90	79.7	1e-18	38/89	42	AP01245
PUT533148619	622	134	397	1	88	90	79.7	1e-18	40/89	44	AP01245
PUT81137	239	55	231	5	63	63	79.3	1e-18	31/59	52	AP00991
PUT82661	619	121	387	1	88	90	79.3	1e-18	38/90	42	AP01245
PUT126050	737	179	442	1	88	90	79	2e-18	40/89	44	AP01245
PUT126628	661	137	403	1	88	90	78.6	2e-18	40/91	43	AP01245
PUT127685	915	427	690	1	88	90	79	2e-18	40/89	44	AP01245
PUT143466	804	173	436	1	88	90	79	2e-18	40/89	44	AP01245
PUT143924	1098	211	474	1	88	90	79	2e-18	40/89	44	AP01245
PUT145579	607	132	395	1	88	90	79	2e-18	40/89	44	AP01245
PUT145893	728	451	188	1	88	90	79	2e-18	40/89	44	AP01245
PUT146000	733	155	418	1	88	90	79	2e-18	40/89	44	AP01245
PUT4545	1137	422	234	5	66	66	79	2e-18	33/63	52	AP00992
PUT470148617	546	140	403	1	88	90	79	2e-18	40/89	44	AP01245
PUT470148618	794	253	516	1	88	90	79	2e-18	40/89	44	AP01245
PUT520148612	681	652	401	6	88	90	78.6	2e-18	37/84	44	AP01245
PUT526148620	850	128	391	1	88	90	79	2e-18	40/89	44	AP01245
PUT526148621	1134	592	855	1	88	90	79	2e-18	40/89	44	AP01245
PUT533148613	887	129	392	1	88	90	79	2e-18	40/89	44	AP01245
PUT533148614	894	111	374	1	88	90	79	2e-18	40/89	44	AP01245
PUT533148615	861	41	304	1	88	90	79	2e-18	40/89	44	AP01245
PUT533148616	905	127	390	1	88	90	79	2e-18	40/89	44	AP01245
PUT533148617	883	136	399	1	88	90	79	2e-18	40/89	44	AP01245
PUT533148618	971	168	431	1	88	90	79	2e-18	40/89	44	AP01245
PUT533148620	1129	559	296	1	88	90	79	2e-18	40/89	44	AP01245
PUT533148621	999	558	295	1	88	90	79	2e-18	40/89	44	AP01245
PUT82660	605	170	436	1	88	90	79.3	2e-18	38/90	42	AP01245
PUT82696	784	410	144	1	88	90	79.3	2e-18	38/90	42	AP01245
PUT126570	527	472	206	1	88	90	78.2	3e-18	39/89	43	AP01245
PUT15186	791	499	236	1	88	90	77.8	4e-18	38/89	42	AP01245
PUT88359	2080	332	595	1	88	90	77.8	4e-18	38/89	42	AP01245
PUT88571	817	224	487	1	88	90	77.8	4e-18	38/89	42	AP01245
PUT122765	249	133	249	2	40	51	77.4	5e-18	33/39	84	AP00287
PUT132148612	519	101	343	1	78	90	77.4	5e-18	37/81	45	AP01245
PUT15104	738	119	382	1	88	90	77.8	5e-18	38/89	42	AP01245
PUT522148614	936	522	241	2	88	90	77.4	6e-18	40/94	42	AP01245
PUT91713	733	500	240	2	88	90	77.4	6e-18	37/88	42	AP01245
PUT126858	1218	784	1056	1	88	90	77	7e-18	38/91	41	AP01245
PUT126930	676	144	416	1	88	90	77	7e-18	38/91	41	AP01245
PUT127076	627	113	385	1	88	90	77	7e-18	38/91	41	AP01245
PUT71515	593	205	345	1	47	47	77	8e-18	31/47	65	AP01382
PUT16384	1237	221	403	7	66	66	76.6	9e-18	32/61	52	AP00992
PUT47612	245	223	83	4	50	50	76.6	9e-18	30/47	63	AP00436
PUT145749	543	133	369	1	78	90	76.3	1e-17	37/79	46	AP01245
PUT99892	614	487	221	1	88	90	76.6	1e-17	39/90	43	AP01245
PUT115188	654	468	587	1	40	66	63.2	2e-17	24/40	60	AP00992
PUT134392	747	483	232	1	83	90	75.9	2e-17	38/85	44	AP01245
PUT601148615	630	110	379	1	88	90	75.1	2e-17	38/91	41	AP01245
PUT79090	798	499	236	1	88	90	75.5	2e-17	37/89	41	AP01245
PUT87925	769	450	256	2	66	66	75.5	2e-17	31/65	47	AP00992
PUT601148614	2203	1075	1344	1	88	90	75.1	3e-17	38/91	41	AP01245
PUT121085	642	570	313	1	88	90	74.3	4e-17	38/88	43	AP01245
PUT128227	1596	877	1146	1	88	90	75.1	4e-17	38/91	41	AP01245
PUT54148620	615	138	371	1	78	90	74.7	4e-17	36/79	45	AP01245
PUT114652	386	105	383	1	90	90	73.9	5e-17	37/93	39	AP01245
PUT120862	664	154	411	1	88	90	74.3	5e-17	38/88	43	AP01245
PUT131148620	537	103	375	1	88	90	73.9	6e-17	38/91	41	AP01245
PUT37788	563	154	255	4	37	66	73.9	6e-17	30/34	88	AP00992
PUT423148621	742	184	441	1	88	90	73.9	7e-17	38/88	43	AP01245
PUT147304	591	136	408	1	88	90	73.6	8e-17	39/91	42	AP01245
PUT144988	439	146	277	1	44	46	73.2	9e-17	31/44	70	AP01277
PUT505148621	516	140	271	1	44	46	73.2	9e-17	31/44	70	AP01277
PUT100831	454	112	384	1	88	90	72.8	1e-16	36/91	39	AP01245
PUT112444	477	448	185	1	88	90	73.2	1e-16	35/89	39	AP01245
PUT121415	1182	1083	967	1	39	41	72.8	1e-16	28/39	71	AP00270
PUT146309	395	112	243	1	44	46	73.2	1e-16	31/44	70	AP01277
PUT147982	327	135	266	1	44	46	73.2	1e-16	31/44	70	AP01277
PUT15061	291	154	59	20	51	51	73.2	1e-16	30/32	93	AP00287
PUT25503	325	77	193	1	39	41	72.8	1e-16	28/39	71	AP00270
PUT27868	535	156	416	1	90	90	73.2	1e-16	39/90	43	AP01245
PUT359148615	815	409	233	5	63	63	72.8	1e-16	28/59	47	AP00991
PUT495148617	544	148	279	1	44	46	73.2	1e-16	31/44	70	AP01277
PUT495148619	1110	399	530	1	44	46	73.2	1e-16	31/44	70	AP01277
PUT506148612	711	145	276	1	44	46	73.2	1e-16	31/44	70	AP01277
PUT506148613	581	148	279	1	44	46	73.2	1e-16	31/44	70	AP01277
PUT522148619	1207	554	321	12	88	90	72.8	1e-16	35/78	44	AP01245
PUT87889	958	196	372	5	63	63	72.8	1e-16	28/59	47	AP00991
PUT105519	711	162	377	1	71	90	72.4	2e-16	36/73	49	AP01245
PUT117875	577	333	157	5	63	63	72.4	2e-16	29/59	49	AP00991
PUT120861	748	155	412	1	88	90	72.8	2e-16	37/88	42	AP01245
PUT135299	594	264	440	5	63	63	72.4	2e-16	29/59	49	AP00991
PUT147449	802	474	286	28	88	90	72	2e-16	33/63	52	AP01245
PUT28716	527	109	264	1	51	51	72.4	2e-16	37/52	71	AP00489
PUT41229	652	346	522	5	63	63	72.4	2e-16	29/59	49	AP00991
PUT91365	816	568	308	2	88	90	72	2e-16	33/88	37	AP01245
PUT1226	763	452	210	9	88	90	72	3e-16	35/82	42	AP01245
PUT146809	638	217	402	29	88	90	71.6	3e-16	33/62	53	AP01245
PUT147805	421	138	377	11	90	90	71.6	3e-16	38/81	46	AP01245
PUT98076	1155	129	254	1	43	45	71.6	3e-16	28/43	65	AP00495
PUT109172	648	160	426	1	88	90	71.2	4e-16	37/90	41	AP01245
PUT127764	950	112	240	1	44	90	46.6	4e-16	22/44	50	AP01245
PUT135312	558	287	463	5	63	63	71.2	4e-16	29/59	49	AP00991
PUT148325	474	115	387	1	88	90	71.2	4e-16	36/91	39	AP01245
PUT126544	517	432	217	20	88	90	70.9	5e-16	35/72	48	AP01245
PUT13258	536	112	381	1	88	90	70.9	5e-16	36/91	39	AP01245
PUT72428	557	286	462	5	63	63	70.9	5e-16	29/59	49	AP00991
PUT147623	746	426	157	1	88	90	70.9	6e-16	37/91	40	AP01245
PUT122581	879	471	208	1	88	90	70.5	7e-16	36/89	40	AP01245
PUT130141	548	110	382	1	88	90	70.5	7e-16	36/91	39	AP01245
PUT133855	620	233	409	5	63	63	70.1	8e-16	26/59	44	AP00991
PUT62387	812	441	617	5	63	63	70.1	8e-16	26/59	44	AP00991
PUT65661	619	250	426	5	63	63	70.1	8e-16	26/59	44	AP00991
PUT92470	758	267	130	2	49	49	70.5	8e-16	28/48	58	AP00004
PUT65660	732	368	192	5	63	63	70.1	9e-16	26/59	44	AP00991
PUT65662	603	246	422	5	63	63	70.1	9e-16	26/59	44	AP00991
PUT8734	898	411	587	5	63	63	70.1	9e-16	26/59	44	AP00991
PUT140676	668	143	412	1	90	90	69.3	1e-15	33/90	36	AP01245
PUT142373	770	545	721	5	63	63	70.1	1e-15	26/59	44	AP00991
PUT146531	980	560	297	1	88	90	70.1	1e-15	36/89	40	AP01245
PUT508148613	718	190	375	5	66	66	69.7	1e-15	31/62	50	AP00992
PUT520148616	877	3	221	17	88	90	69.3	1e-15	33/73	45	AP01245
PUT65434	752	249	425	5	63	63	70.1	1e-15	26/59	44	AP00991
PUT65436	980	585	761	5	63	63	70.1	1e-15	26/59	44	AP00991
PUT8735	1416	286	462	5	63	63	70.1	1e-15	26/59	44	AP00991
PUT9355	1047	327	503	5	63	63	70.1	1e-15	26/59	44	AP00991
PUT137799	1094	632	886	1	88	90	69.3	2e-15	36/88	40	AP01245
PUT137890	927	217	471	1	88	90	69.3	2e-15	36/88	40	AP01245
PUT137891	716	407	661	1	88	90	69.3	2e-15	36/88	40	AP01245
PUT60408	353	145	276	1	44	46	68.9	2e-15	29/44	65	AP01277
PUT143987	700	128	295	1	56	90	68.2	3e-15	29/56	51	AP01245
PUT146130	494	30	197	1	56	90	68.2	3e-15	29/56	51	AP01245
PUT131514	269	267	151	26	63	63	67.8	4e-15	28/39	71	AP00991
PUT135478	796	551	291	2	88	90	67.8	4e-15	33/88	37	AP01245
PUT138095	547	464	201	2	88	90	67.8	4e-15	34/88	38	AP01245
PUT85824	783	91	363	1	88	90	68.2	4e-15	37/91	40	AP01245
PUT147434	791	348	160	29	88	90	67.4	5e-15	32/63	50	AP01245
PUT41210	796	570	322	6	88	90	67.4	5e-15	34/84	40	AP01245
PUT91715	764	476	252	14	88	90	67.8	5e-15	32/76	42	AP01245
PUT519148619	491	127	339	21	88	90	67.4	6e-15	35/71	49	AP01245
PUT144539	273	146	268	1	41	46	67	7e-15	29/41	70	AP01277
PUT144650	455	433	257	32	88	90	67	7e-15	32/59	54	AP01245
PUT21446	794	533	270	1	88	90	66.6	9e-15	34/89	38	AP01245
PUT71301	837	441	253	5	66	66	66.6	9e-15	30/63	47	AP00992
PUT121088	682	262	501	1	82	90	66.2	1e-14	34/82	41	AP01245
PUT125736	815	503	240	1	88	90	66.2	1e-14	34/89	38	AP01245
PUT146759	804	172	336	1	56	90	56.2	1e-14	25/56	44	AP01245
PUT26931	755	45	191	1	48	51	66.6	1e-14	34/49	69	AP00489
PUT38046	684	75	221	1	48	51	66.6	1e-14	34/49	69	AP00489
PUT65435	557	247	423	5	63	63	66.6	1e-14	26/59	44	AP00991
PUT83734	261	259	143	26	63	63	66.2	1e-14	28/39	71	AP00991
PUT24948	922	599	348	1	87	90	65.9	2e-14	35/87	40	AP01245
PUT273148617	810	430	242	27	88	90	65.9	2e-14	30/63	47	AP01245
PUT47524	542	188	382	25	88	90	62.8	2e-14	28/65	43	AP01245
PUT108942	434	106	246	1	47	47	64.7	3e-14	24/47	51	AP01385
PUT132756	314	190	312	5	45	66	64.7	3e-14	26/41	63	AP00992
PUT17354	605	138	407	1	90	90	65.1	3e-14	30/90	33	AP01245
PUT37099	322	310	212	34	66	66	64.7	3e-14	25/33	75	AP00992
PUT60029	788	225	392	1	57	90	65.5	3e-14	29/57	50	AP01245
PUT440148618	642	62	208	1	48	51	64.3	4e-14	33/49	67	AP00489
PUT94707	631	511	365	1	48	51	64.3	4e-14	33/49	67	AP00489
PUT145691	738	411	145	2	88	90	64.3	5e-14	34/90	37	AP01245
PUT149148614	840	76	222	1	48	51	64.3	5e-14	33/49	67	AP00489
PUT38916	552	63	209	1	48	51	64.3	5e-14	33/49	67	AP00489
PUT438148620	886	110	256	1	48	51	64.3	5e-14	33/49	67	AP00489
PUT438148621	537	62	208	1	48	51	64.3	5e-14	33/49	67	AP00489
PUT439148612	648	66	212	1	48	51	64.3	5e-14	33/49	67	AP00489
PUT468148618	672	59	205	1	48	51	64.3	5e-14	33/49	67	AP00489
PUT468148619	692	60	206	1	48	51	64.3	5e-14	33/49	67	AP00489
PUT61282	647	75	221	1	48	51	64.3	5e-14	33/49	67	AP00489
PUT61344	603	71	217	1	48	51	64.3	5e-14	33/49	67	AP00489
PUT61345	684	552	406	1	48	51	64.3	5e-14	33/49	67	AP00489
PUT65472	693	84	230	1	48	51	64.3	5e-14	33/49	67	AP00489
PUT85500	835	72	218	1	48	51	64.3	5e-14	33/49	67	AP00489
PUT143587	390	102	317	1	76	90	63.9	6e-14	31/76	40	AP01245
PUT45187	371	131	271	1	47	47	63.9	6e-14	24/47	51	AP01385
PUT82985	475	64	207	2	48	51	63.9	6e-14	33/48	68	AP00489
PUT90557	771	64	210	1	48	51	64.3	6e-14	33/49	67	AP00489
PUT49167	732	131	253	1	39	41	63.5	9e-14	26/41	63	AP00270
PUT118415	396	150	326	1	60	90	63.2	1e-13	29/60	48	AP01245
PUT134709	463	106	375	1	88	90	62.8	1e-13	34/91	37	AP01245
PUT136734	431	98	358	1	85	90	63.2	1e-13	33/88	37	AP01245
PUT38171	773	158	334	1	59	90	63.2	1e-13	27/59	45	AP01245
PUT99522	692	152	271	2	39	41	62.8	1e-13	26/40	65	AP00270
PUT132148613	834	677	832	1	52	90	62.4	2e-13	26/52	50	AP01245
PUT99523	736	155	274	2	39	41	62.8	2e-13	26/40	65	AP00270
PUT137666	406	135	314	1	60	90	60.8	3e-13	27/60	45	AP01245
PUT3491	717	107	250	4	51	51	62	3e-13	27/48	56	AP00489
PUT45186	754	409	230	30	88	90	61.6	3e-13	29/60	48	AP01245
PUT101649	327	269	105	9	63	63	61.2	4e-13	26/55	47	AP00991
PUT122378	738	156	314	2	51	51	61.2	4e-13	29/53	54	AP00286
PUT9351	782	25	225	1	63	63	61.2	5e-13	28/67	41	AP00991
PUT131395	587	267	443	5	63	63	60.8	6e-13	22/59	37	AP00991
PUT19745	446	410	228	3	63	63	60.5	6e-13	30/61	49	AP00991
PUT114743	623	115	207	15	45	45	60.1	8e-13	22/31	70	AP00495
PUT13409	341	103	270	1	56	90	60.1	8e-13	26/56	46	AP01245
PUT40988	754	390	205	32	88	90	60.5	8e-13	30/62	48	AP01245
PUT120571	521	79	186	16	51	51	59.3	1e-12	27/36	75	AP00489
PUT144021	430	160	279	5	44	46	59.7	1e-12	26/40	65	AP01277
PUT145148615	588	192	326	1	47	47	60.1	1e-12	24/47	51	AP01382
PUT33704	497	126	350	2	74	84	59.7	1e-12	34/75	45	AP00404
PUT41536	419	136	303	1	56	90	59.7	1e-12	27/56	48	AP01245
PUT4546	817	692	817	7	48	66	59.3	1e-12	24/42	57	AP00992
PUT601148618	741	517	693	1	60	90	59.7	1e-12	27/60	45	AP01245
PUT106361	441	44	304	1	86	90	58.9	2e-12	32/88	36	AP01245
PUT115906	516	117	368	1	88	90	58.5	2e-12	34/89	38	AP01245
PUT120183	318	164	316	1	52	90	58.5	2e-12	26/52	50	AP01245
PUT62148	344	98	241	4	51	51	58.5	2e-12	26/48	54	AP00489
PUT78133	669	130	237	16	51	51	59.3	2e-12	27/36	75	AP00489
PUT91494	336	2	88	35	63	63	58.9	2e-12	24/29	82	AP00991
PUT145927	623	216	419	20	88	90	57.8	4e-12	33/70	47	AP01245
PUT65360	810	478	627	17	66	84	57.8	4e-12	27/50	54	AP00404
PUT101388	473	238	288	16	32	63	38.9	5e-12	14/17	82	AP00991
PUT114697	792	127	207	15	41	45	57.4	5e-12	20/27	74	AP00495
PUT85738	787	220	378	5	57	63	57.8	5e-12	26/53	49	AP00991
PUT114742	562	123	203	15	41	45	57.4	6e-12	20/27	74	AP00495
PUT134148615	747	113	247	4	48	51	57	8e-12	25/45	55	AP00489
PUT3492	708	127	261	4	48	51	57	8e-12	25/45	55	AP00489
PUT3493	682	94	228	4	48	51	57	8e-12	25/45	55	AP00489
PUT9356	427	33	209	5	63	63	57	8e-12	23/59	38	AP00991
PUT30447	1005	149	283	4	48	51	57	9e-12	25/45	55	AP00489
PUT3490	1020	458	592	4	48	51	57	9e-12	25/45	55	AP00489
PUT5543	1059	189	323	4	48	51	57	9e-12	25/45	55	AP00489
PUT95116	809	253	405	1	51	51	56.6	9e-12	21/51	41	AP00287
PUT12466	559	164	304	1	47	47	56.2	1e-11	23/47	48	AP01330
PUT12826	429	164	304	1	47	47	56.2	1e-11	23/47	48	AP01330
PUT12828	796	385	245	1	47	47	56.2	1e-11	24/47	51	AP01330
PUT12829	539	158	298	1	47	47	56.2	1e-11	23/47	48	AP01330
PUT131557	432	108	248	1	47	47	56.2	1e-11	23/47	48	AP01330
PUT159148616	930	250	110	1	47	47	56.2	1e-11	24/47	51	AP01330
PUT48725	464	354	178	5	63	63	56.2	1e-11	26/59	44	AP00991
PUT62238	736	164	316	1	51	51	56.6	1e-11	21/51	41	AP00287
PUT65659	513	247	363	5	43	63	48.9	1e-11	17/39	43	AP00991
PUT81491	613	153	293	1	47	47	56.2	1e-11	23/47	48	AP01330
PUT81492	600	219	359	1	47	47	56.2	1e-11	23/47	48	AP01330
PUT81564	676	151	291	1	47	47	56.2	1e-11	23/47	48	AP01330
PUT121999	176	1	81	24	50	51	55.5	2e-11	24/27	88	AP00286
PUT126442	583	182	334	1	51	51	55.8	2e-11	20/51	39	AP00287
PUT126909	658	93	227	4	48	51	55.8	2e-11	24/45	53	AP00489
PUT127351	1252	685	819	4	48	51	55.8	2e-11	24/45	53	AP00489
PUT128293	842	93	227	4	48	51	55.8	2e-11	24/45	53	AP00489
PUT144927	500	203	355	1	51	51	55.8	2e-11	19/51	37	AP00287
PUT148262	601	184	336	1	51	51	55.8	2e-11	19/51	37	AP00287
PUT43067	804	584	324	2	88	90	55.5	2e-11	28/88	31	AP01245
PUT48743	886	59	193	2	47	51	55.8	2e-11	27/46	58	AP00489
PUT521148619	799	364	188	31	88	90	55.5	2e-11	28/59	47	AP01245
PUT5544	1067	685	548	2	48	51	56.2	2e-11	27/47	57	AP00489
PUT582148614	726	206	340	4	48	51	55.8	2e-11	24/45	53	AP00489
PUT78212	566	467	312	1	48	51	55.8	2e-11	30/52	57	AP00489
PUT9353	511	251	430	5	63	63	55.5	2e-11	24/60	40	AP00991
PUT97608	735	111	245	4	48	51	55.8	2e-11	24/45	53	AP00489
PUT97609	728	136	270	4	48	51	55.8	2e-11	24/45	53	AP00489
PUT121087	596	155	262	1	36	90	38.9	3e-11	16/36	44	AP01245
PUT126884	556	186	338	1	51	51	55.1	3e-11	18/51	35	AP00287
PUT147827	736	211	351	1	47	90	55.1	3e-11	24/47	51	AP01245
PUT78680	774	158	310	1	51	51	55.1	3e-11	21/51	41	AP00287
PUT78719	504	387	235	1	51	51	55.1	3e-11	21/51	41	AP00287
PUT94376	587	190	342	1	51	51	55.1	3e-11	20/51	39	AP00287
PUT9636	1233	573	680	13	48	51	55.1	3e-11	25/36	69	AP00489
PUT9637	597	123	230	13	48	51	55.1	3e-11	25/36	69	AP00489
PUT9638	750	141	248	13	48	51	55.1	3e-11	25/36	69	AP00489
PUT127437	561	162	314	1	51	51	54.7	4e-11	19/51	37	AP00287
PUT145177	435	138	290	1	51	51	54.3	4e-11	20/51	39	AP00287
PUT128199	911	170	18	1	51	51	54.3	5e-11	20/51	39	AP00287
PUT116596	965	313	576	1	88	90	54.3	6e-11	29/89	32	AP01245
PUT127954	1222	301	149	1	51	51	53.9	6e-11	19/51	37	AP00287
PUT127976	847	192	344	1	51	51	53.9	6e-11	19/51	37	AP00287
PUT1845	629	39	197	4	50	51	53.9	6e-11	32/53	60	AP00489
PUT45285	809	205	363	4	50	51	53.9	6e-11	32/53	60	AP00489
PUT1844	723	128	286	4	50	51	53.9	7e-11	32/53	60	AP00489
PUT18712	711	133	246	11	48	51	53.9	7e-11	25/38	65	AP00489
PUT30543	1319	387	545	4	50	51	53.9	7e-11	32/53	60	AP00489
PUT45170	722	130	288	4	50	51	53.9	7e-11	32/53	60	AP00489
PUT45171	904	136	294	4	50	51	53.9	7e-11	32/53	60	AP00489
PUT45284	602	130	288	4	50	51	53.9	7e-11	32/53	60	AP00489
PUT65262	702	126	239	11	48	51	53.9	7e-11	25/38	65	AP00489
PUT18667	1446	133	246	11	48	51	53.9	8e-11	25/38	65	AP00489
PUT209148614	1013	383	231	1	51	51	53.9	8e-11	19/51	37	AP00287
PUT78024	640	130	228	16	48	51	53.5	8e-11	24/33	72	AP00489
PUT78132	854	260	358	16	48	51	53.5	8e-11	24/33	72	AP00489
PUT9970	643	155	253	16	48	51	53.5	8e-11	24/33	72	AP00489
PUT9971	817	489	391	16	48	51	53.5	8e-11	24/33	72	AP00489
PUT94414	566	158	310	1	51	51	53.5	9e-11	19/51	37	AP00287
PUT9855	704	156	254	16	48	51	53.5	9e-11	24/33	72	AP00489
PUT350148614	691	164	316	1	51	51	53.1	1e-10	19/51	37	AP00287
PUT351148617	477	162	314	1	51	51	53.1	1e-10	19/51	37	AP00287
PUT73290	530	440	165	1	90	90	53.1	1e-10	33/93	35	AP01245
PUT87468	689	325	173	1	51	51	52.8	1e-10	20/51	39	AP00287
PUT11525	1150	132	227	1	36	41	52.4	2e-10	19/36	52	AP00270
PUT137889	614	153	407	1	88	90	52.4	2e-10	33/88	37	AP01245
PUT138126	1114	939	844	1	36	41	52.4	2e-10	19/36	52	AP00270
PUT16945	677	182	289	16	50	51	52	2e-10	28/36	77	AP00489
PUT3377	672	192	299	16	50	51	52	2e-10	28/36	77	AP00489
PUT33890	672	155	253	16	48	51	52	2e-10	23/33	69	AP00489
PUT35532	249	118	14	29	63	90	49.7	2e-10	21/35	60	AP01245
PUT48898	337	302	138	37	88	90	52.4	2e-10	26/55	47	AP01245
PUT59025	892	209	451	2	88	90	52.4	2e-10	32/91	35	AP01245
PUT59026	997	690	448	2	88	90	52.4	2e-10	32/91	35	AP01245
PUT65103	527	184	336	1	51	51	52.4	2e-10	19/51	37	AP00287
PUT74276	811	106	201	1	36	41	52.4	2e-10	19/36	52	AP00270
PUT145341	746	743	654	20	50	90	42.4	3e-10	20/31	64	AP01245
PUT3378	753	198	305	16	50	51	52	3e-10	28/36	77	AP00489
PUT36	764	153	383	3	83	90	52	3e-10	27/83	32	AP01245
PUT53997	509	168	302	2	46	47	51.6	3e-10	23/45	51	AP01330
PUT690148620	906	162	383	2	77	90	51.6	3e-10	27/79	34	AP01245
PUT13450	807	22	168	1	48	51	51.2	4e-10	27/49	55	AP00489
PUT138605	224	124	222	19	51	51	51.2	4e-10	23/33	69	AP00489
PUT141929	900	613	828	6	74	84	51.2	4e-10	31/72	43	AP00404
PUT59027	867	192	434	2	88	90	51.2	4e-10	31/91	34	AP01245
PUT94176	605	364	113	3	90	90	51.6	4e-10	27/90	30	AP01245
PUT58592	673	509	279	3	83	90	50.8	5e-10	27/83	32	AP01245
PUT60139	816	263	361	16	48	51	50.8	5e-10	23/33	69	AP00489
PUT95307	635	144	242	16	48	51	50.8	5e-10	23/33	69	AP00489
PUT25182	594	532	440	21	51	51	50.8	6e-10	23/31	74	AP00489
PUT95308	737	133	231	16	48	51	50.8	6e-10	23/33	69	AP00489
PUT102284	814	663	442	2	77	90	50.4	7e-10	27/79	34	AP01245
PUT37	814	185	415	3	83	90	50.4	7e-10	26/83	31	AP01245
PUT112283	440	114	386	2	88	90	50.1	8e-10	31/92	33	AP01245
PUT83105	767	585	343	3	87	90	50.4	8e-10	27/87	31	AP01245
PUT60586	472	152	292	1	47	47	50.1	9e-10	22/47	46	AP01330
PUT104380	694	133	270	1	45	46	49.7	1e-09	19/46	41	AP01277
PUT134537	982	64	210	1	48	51	49.7	1e-09	30/49	61	AP00489
PUT137487	741	176	304	1	44	46	49.7	1e-09	20/44	45	AP01277
PUT145563	637	2	145	43	88	90	49.7	1e-09	22/48	45	AP01245
PUT86605	727	644	477	34	88	90	50.1	1e-09	25/56	44	AP01245
PUT86896	774	248	138	15	51	51	49.7	1e-09	15/37	40	AP00287
PUT92735	712	168	275	16	51	51	50.1	1e-09	24/36	66	AP00489
PUT116337	811	612	472	4	44	51	48.9	2e-09	29/47	61	AP00489
PUT122629	492	116	367	1	88	90	48.9	2e-09	26/88	29	AP01245
PUT137529	399	127	255	1	44	46	48.9	2e-09	20/44	45	AP01277
PUT18488	746	217	438	2	77	90	48.9	2e-09	27/79	34	AP01245
PUT22097	746	134	220	1	36	41	48.9	2e-09	20/36	55	AP00270
PUT34995	729	70	177	13	48	51	49.3	2e-09	22/36	61	AP00489
PUT65657	615	248	352	5	39	63	35	2e-09	12/35	34	AP00991
PUT77102	1175	94	180	1	36	41	48.9	2e-09	20/36	55	AP00270
PUT12670	843	258	473	1	74	90	48.1	3e-09	27/77	35	AP01245
PUT18515	631	540	436	1	41	41	48.1	3e-09	22/42	52	AP00270
PUT24244	287	231	287	1	19	23	48.1	3e-09	19/19	100	AP01359
PUT26508	746	525	382	4	50	51	48.5	3e-09	28/48	58	AP00489
PUT60587	859	432	512	1	27	47	48.5	3e-09	20/27	74	AP01330
PUT60622	782	132	212	1	27	47	48.5	3e-09	20/27	74	AP01330
PUT94709	166	36	164	2	43	51	48.1	3e-09	26/43	60	AP00489
PUT95345	531	106	204	16	48	51	48.1	3e-09	22/33	66	AP00489
PUT103613	382	153	308	1	51	51	48.1	4e-09	24/52	46	AP00286
PUT108488	648	146	238	18	48	51	47.8	4e-09	21/31	67	AP00489
PUT112714	820	665	525	5	50	51	47.8	4e-09	26/47	55	AP00489
PUT137528	694	140	268	1	44	46	48.1	4e-09	19/44	43	AP01277
PUT17019	532	437	285	2	53	90	47.8	4e-09	23/52	44	AP01245
PUT34478	735	119	382	1	88	90	48.1	4e-09	25/89	28	AP01245
PUT57171	633	126	221	1	36	41	47.8	4e-09	18/36	50	AP00270
PUT62761	406	156	245	19	48	51	47.8	4e-09	21/30	70	AP00489
PUT68497	315	115	213	16	48	51	47.8	4e-09	22/33	66	AP00489
PUT72687	824	98	238	5	50	51	47.8	4e-09	26/47	55	AP00489
PUT90573	457	457	212	8	87	90	47.8	4e-09	26/83	31	AP01245
PUT127500	487	164	316	1	51	51	47.8	5e-09	17/51	33	AP00287
PUT147978	777	79	237	4	50	51	47.8	5e-09	29/53	54	AP00489
PUT72628	745	182	322	5	50	51	47.8	5e-09	26/47	55	AP00489
PUT85054	931	156	245	19	48	51	47.8	5e-09	21/30	70	AP00489
PUT85056	745	144	233	19	48	51	47.8	5e-09	21/30	70	AP00489
PUT20310	686	59	121	9	29	30	47.4	6e-09	16/21	76	AP00912
PUT72627	1499	124	264	5	50	51	47.8	6e-09	26/47	55	AP00489
PUT94184	1022	176	250	12	36	41	47.8	6e-09	15/25	60	AP00270
PUT82211	123	20	121	5	38	66	47	7e-09	19/34	55	AP00992
PUT112746	577	510	406	17	51	51	47	8e-09	20/35	57	AP00489
PUT32110	99	99	46	34	51	51	46.6	9e-09	17/18	94	AP00287
PUT121125	723	157	264	16	50	51	46.2	1e-08	24/36	66	AP00489
PUT121126	708	167	274	16	50	51	46.2	1e-08	24/36	66	AP00489
PUT132106	450	24	260	2	71	79	46.6	1e-08	32/80	40	AP00690
PUT137732	550	154	237	23	50	51	46.2	1e-08	20/28	71	AP00489
PUT140640	478	100	246	2	49	49	46.6	1e-08	21/49	42	AP00004
PUT147503	597	139	306	1	56	90	46.6	1e-08	23/57	40	AP01245
PUT25443	843	251	466	1	74	90	46.2	1e-08	28/79	35	AP01245
PUT25536	581	104	319	1	74	90	46.2	1e-08	28/79	35	AP01245
PUT40419	463	434	273	2	56	90	44.7	1e-08	22/55	40	AP01245
PUT51549	450	136	270	1	45	46	46.6	1e-08	18/45	40	AP01277
PUT744	712	327	545	22	73	84	46.6	1e-08	30/73	41	AP00404
PUT109050	357	1	156	30	78	90	45.8	2e-08	23/52	44	AP01245
PUT120505	761	193	300	16	50	51	46.2	2e-08	24/36	66	AP00489
PUT120543	785	265	372	16	50	51	46.2	2e-08	24/36	66	AP00489
PUT22249	261	103	228	1	42	90	45.4	2e-08	19/42	45	AP01245
PUT102386	668	125	205	23	49	51	45.1	3e-08	20/27	74	AP00489
PUT114685	774	452	222	13	88	90	45.4	3e-08	29/78	37	AP01245
PUT137207	233	1	66	30	51	51	45.1	3e-08	18/22	81	AP00287
PUT25442	746	144	359	1	74	90	45.1	3e-08	27/79	34	AP01245
PUT4404	593	151	390	14	90	90	45.1	3e-08	23/80	28	AP01245
PUT70515	952	318	401	21	48	51	45.1	3e-08	20/28	71	AP00489
PUT103209	809	324	431	16	50	51	44.7	4e-08	23/36	63	AP00489
PUT111303	1034	151	240	1	37	41	45.1	4e-08	19/37	51	AP00270
PUT120020	421	51	143	33	63	63	44.7	4e-08	17/31	54	AP00991
PUT121438	755	416	258	2	54	90	44.7	4e-08	20/53	37	AP01245
PUT136055	109	109	56	34	51	51	44.7	4e-08	16/18	88	AP00287
PUT143755	601	132	266	1	46	90	44.7	4e-08	22/47	46	AP01245
PUT80248	1027	147	236	1	37	41	45.1	4e-08	19/37	51	AP00270
PUT97938	705	182	289	16	50	51	44.7	4e-08	23/36	63	AP00489
PUT17632	462	433	170	2	87	90	44.3	5e-08	31/89	34	AP01245
PUT41650	413	394	251	42	88	90	44.3	5e-08	20/48	41	AP01245
PUT103609	148	4	57	34	51	51	43.9	6e-08	16/18	88	AP00287
PUT121353	604	103	213	7	40	51	43.1	6e-08	21/37	56	AP00489
PUT98176	336	20	112	21	52	52	43.9	7e-08	18/32	56	AP00993
PUT99395	609	43	258	3	76	90	43.9	7e-08	23/79	29	AP01245
PUT121155	798	187	264	23	48	51	43.5	8e-08	19/26	73	AP00489
PUT148430	310	1	144	42	88	90	43.5	8e-08	21/48	43	AP01245
PUT121204	508	153	230	23	48	51	43.5	9e-08	19/26	73	AP00489
PUT121205	675	155	232	23	48	51	43.5	9e-08	19/26	73	AP00489
PUT141152	724	166	243	23	48	51	43.5	9e-08	19/26	73	AP00489
PUT115638	749	132	209	23	48	51	43.5	1e-07	19/26	73	AP00489
PUT144773	471	136	249	1	38	90	39.7	1e-07	17/38	44	AP01245
PUT14573	405	43	165	1	41	90	43.1	1e-07	19/41	46	AP01245
PUT34730	1058	283	525	4	83	90	43.1	1e-07	26/86	30	AP01245
PUT522148618	876	369	229	43	88	90	42.7	1e-07	19/47	40	AP01245
PUT113380	767	189	266	23	48	51	42.7	2e-07	19/26	73	AP00489
PUT113489	1044	615	538	23	48	51	42.7	2e-07	19/26	73	AP00489
PUT113490	1064	616	539	23	48	51	42.7	2e-07	19/26	73	AP00489
PUT113492	999	239	316	23	48	51	42.7	2e-07	19/26	73	AP00489
PUT116686	672	524	348	1	60	90	30.8	2e-07	16/60	26	AP01245
PUT127971	906	478	612	46	88	90	42.7	2e-07	19/45	42	AP01245
PUT137887	176	14	172	29	83	90	42	2e-07	21/55	38	AP01245
PUT18494	326	184	273	27	56	90	36.6	2e-07	14/30	46	AP01245
PUT27830	740	163	240	23	48	51	42.7	2e-07	19/26	73	AP00489
PUT398148613	767	303	518	3	76	90	42.7	2e-07	22/79	27	AP01245
PUT4483	480	475	332	5	53	90	42.4	2e-07	20/49	40	AP01245
PUT6656	547	462	545	30	57	84	42.4	2e-07	18/28	64	AP00404
PUT68893	289	278	216	32	52	52	42	2e-07	14/21	66	AP00993
PUT80640	354	230	352	2	42	66	42	2e-07	17/41	41	AP00992
PUT87529	1025	192	296	1	41	41	42.7	2e-07	20/42	47	AP00270
PUT51868	737	318	437	13	63	63	42	3e-07	21/51	41	AP00991
PUT59497	658	90	167	23	48	51	41.6	3e-07	18/26	69	AP00489
PUT14084	469	146	226	25	51	51	41.2	4e-07	13/27	48	AP00287
PUT143497	267	113	250	1	47	90	41.2	4e-07	20/47	42	AP01245
PUT24947	1162	324	539	4	75	78	41.2	4e-07	20/73	27	AP01340
PUT81231	420	326	376	35	51	51	41.2	4e-07	15/17	88	AP00287
PUT82192	1120	577	822	5	73	79	41.6	4e-07	34/83	40	AP00690
PUT9354	533	290	397	19	56	66	41.2	4e-07	16/38	42	AP00992
PUT9973	300	129	212	13	40	51	41.2	4e-07	18/28	64	AP00489
PUT34947	707	177	254	23	48	51	41.2	5e-07	18/26	69	AP00489
PUT51656	1076	317	532	4	75	78	41.2	5e-07	20/73	27	AP01340
PUT77402	922	365	580	4	75	78	41.2	5e-07	20/73	27	AP01340
PUT113431	769	168	410	4	83	90	40.8	6e-07	26/86	30	AP01245
PUT120472	700	700	617	43	71	79	40.8	6e-07	17/29	58	AP00690
PUT143490	440	194	289	57	88	90	32.7	6e-07	15/32	46	AP01245
PUT144666	409	61	186	49	88	90	40.8	6e-07	18/42	42	AP01245
PUT23731	588	27	269	6	79	79	40.8	6e-07	31/84	36	AP00689
PUT294148621	639	43	105	46	66	66	40.4	7e-07	14/21	66	AP00992
PUT34222	988	531	734	5	67	79	40.4	8e-07	34/74	45	AP00689
PUT47861	446	53	133	1	26	51	30.8	8e-07	17/27	62	AP00489
PUT129255	338	338	108	2	78	84	40	1e-06	28/80	35	AP00404
PUT139030	582	148	285	3	41	44	39.7	1e-06	18/46	39	AP00294
PUT146707	612	482	604	1	41	51	39.7	1e-06	15/41	36	AP00287
PUT19363	805	395	511	13	50	51	39.7	1e-06	24/39	61	AP00489
PUT44015	1173	418	633	4	75	78	39.7	1e-06	19/73	26	AP01340
PUT45963	1100	133	219	1	36	41	40	1e-06	17/36	47	AP00270
PUT4703	617	5	157	23	77	90	39.7	1e-06	21/56	37	AP01245
PUT7931	826	151	267	1	40	51	39.7	1e-06	22/41	53	AP00489
PUT103606	148	4	57	34	51	51	38.9	2e-06	15/18	83	AP00287
PUT14148616	757	488	348	2	41	44	38.9	2e-06	17/47	36	AP00294
PUT34221	892	174	362	14	67	79	38.9	2e-06	31/65	47	AP00689
PUT54787	736	133	360	4	68	90	39.3	2e-06	24/76	31	AP01245
PUT6512	1544	1147	1254	12	41	44	39.3	2e-06	16/36	44	AP00294
PUT93225	681	184	378	6	74	90	39.3	2e-06	22/72	30	AP01245
PUT10453	504	20	172	10	59	79	38.5	3e-06	25/54	46	AP00690
PUT110740	288	260	96	9	58	79	38.1	3e-06	23/55	41	AP00690
PUT129410	497	136	378	4	86	90	38.5	3e-06	22/86	25	AP01245
PUT15376	717	189	281	21	50	51	38.5	3e-06	20/31	64	AP00489
PUT21362	511	445	185	2	88	90	38.5	3e-06	28/88	31	AP01245
PUT52654	784	206	298	21	50	51	38.5	3e-06	20/31	64	AP00489
PUT55006	811	102	1	38	72	79	38.5	3e-06	18/35	51	AP00690
PUT55525	814	405	256	42	89	90	38.5	3e-06	19/50	38	AP01245
PUT78547	741	136	378	4	86	90	38.5	3e-06	22/86	25	AP01245
PUT87312	599	373	597	2	77	79	38.5	3e-06	29/79	36	AP00690
PUT20678	121	119	78	34	47	47	37.7	4e-06	12/14	85	AP01330
PUT59467	404	76	297	3	65	79	38.1	4e-06	26/74	35	AP00690
PUT71388	430	415	287	49	89	90	38.1	4e-06	18/43	41	AP01245
PUT9213	684	188	403	4	75	78	38.1	4e-06	18/73	24	AP01340
PUT96435	709	229	369	2	41	44	38.1	4e-06	16/47	34	AP00294
PUT107495	491	184	309	1	42	46	37.7	5e-06	15/42	35	AP00483
PUT121396	493	126	311	4	54	90	37.7	5e-06	21/62	33	AP01245
PUT124159	531	69	278	3	61	79	37.7	5e-06	23/70	32	AP00689
PUT125628	855	209	433	4	84	90	37.7	5e-06	25/86	29	AP01245
PUT137285	371	159	284	1	42	46	37.7	5e-06	15/42	35	AP00483
PUT39468	1675	1162	1302	2	41	44	38.1	5e-06	16/47	34	AP00294
PUT58388	669	292	570	2	69	79	37.7	5e-06	31/93	33	AP00690
PUT680148612	658	212	337	7	48	66	37.7	5e-06	16/42	38	AP00992
PUT9103	1078	209	424	4	75	78	38.1	5e-06	18/73	24	AP01340
PUT115955	179	65	139	23	47	51	37.4	6e-06	17/25	68	AP00489
PUT522148617	902	390	259	46	88	90	37.4	6e-06	17/44	38	AP01245
PUT62578	218	8	193	25	88	90	37.4	6e-06	19/64	29	AP01245
PUT107768	727	253	366	31	74	84	37.4	7e-06	20/44	45	AP00404
PUT35250	753	418	615	27	92	94	37.4	7e-06	23/66	34	AP00684
PUT40575	579	19	270	3	79	79	37.4	7e-06	30/87	34	AP00689
PUT44076	735	66	281	4	75	78	37.4	7e-06	19/73	26	AP01340
PUT47065	510	97	291	2	65	79	37	7e-06	24/65	36	AP00690
PUT4793	993	985	884	43	76	79	37.4	7e-06	16/34	47	AP00690
PUT21146	354	154	294	1	47	90	37	8e-06	17/47	36	AP01245
PUT69778	1251	478	582	4	38	43	37	8e-06	13/35	37	AP00681
PUT69835	815	66	170	4	38	43	37	8e-06	13/35	37	AP00681
PUT27956	609	79	147	29	51	51	37	9e-06	15/23	65	AP00489
PUT59866	731	319	459	9	55	79	37	9e-06	22/48	45	AP00689
PUT601148619	371	120	224	1	36	90	34.3	9e-06	16/36	44	AP01245
PUT102695	1458	1131	1430	9	76	79	36.6	1e-05	32/100	32	AP00689
PUT106333	710	705	577	12	54	84	36.2	1e-05	18/43	41	AP00404
PUT117567	645	187	405	14	89	90	36.6	1e-05	22/76	28	AP01245
PUT118416	277	157	276	1	41	90	36.2	1e-05	18/41	43	AP01245
PUT120864	533	325	444	3	45	90	36.2	1e-05	13/43	30	AP01245
PUT13032	928	451	663	1	73	94	36.2	1e-05	25/74	33	AP00684
PUT140838	592	248	514	1	67	84	36.6	1e-05	28/90	31	AP00404
PUT146867	340	165	329	17	77	90	36.2	1e-05	20/61	32	AP01245
PUT312148617	592	187	405	14	89	90	36.6	1e-05	22/76	28	AP01245
PUT31451	723	519	704	6	65	79	36.6	1e-05	25/63	39	AP00689
PUT6377	561	70	261	23	76	79	36.6	1e-05	25/64	39	AP00690
PUT66148619	242	110	241	1	45	90	36.2	1e-05	19/45	42	AP01245
PUT68720	763	591	409	12	78	79	36.6	1e-05	29/68	42	AP00690
PUT73113	142	1	51	35	51	51	36.2	1e-05	14/17	82	AP00287
PUT73685	907	504	367	3	41	44	36.2	1e-05	16/46	34	AP00294
PUT73686	922	215	352	3	41	44	36.2	1e-05	16/46	34	AP00294
PUT77509	454	308	442	32	72	79	36.6	1e-05	24/47	51	AP00690

## Sheet: Sheet2
unigene name	Letter	QueryX	QueryY	SbjctX	SbjctY	Length	Score	E value	Overlap/total	Identity	Sbject Name
158e10	927	258	446	4	66	66	124	3e-32	51/63	80	AP00992
025d061	814	174	326	1	51	51	114	4e-29	47/51	92	AP00286
032e07	865	188	340	1	51	51	114	4e-29	47/51	92	AP00286
110b02	905	104	256	1	51	51	114	4e-29	47/51	92	AP00286
126a02	922	202	354	1	51	51	114	4e-29	47/51	92	AP00286
146a11	917	201	353	1	51	51	114	4e-29	47/51	92	AP00286
147b08	922	204	356	1	51	51	114	4e-29	47/51	92	AP00286
148e09	1362	209	361	1	51	51	114	4e-29	47/51	92	AP00286
152c01	932	202	354	1	51	51	114	4e-29	47/51	92	AP00286
153d12	1370	207	359	1	51	51	114	4e-29	47/51	92	AP00286
171h05	1285	204	356	1	51	51	114	4e-29	47/51	92	AP00286
172a02	1364	202	354	1	51	51	114	4e-29	47/51	92	AP00286
190c02	923	205	357	1	51	51	114	4e-29	47/51	92	AP00286
198c04	1353	204	356	1	51	51	114	4e-29	47/51	92	AP00286
199e08	943	201	353	1	51	51	114	4e-29	47/51	92	AP00286
173h03	1407	205	357	1	51	51	114	5e-29	47/51	92	AP00286
186b09	998	204	356	1	51	51	114	5e-29	47/51	92	AP00286
LSYContig1409	1558	208	360	1	51	51	114	5e-29	47/51	92	AP00286
008e02	875	220	369	2	51	51	112	1e-28	46/50	92	AP00287
098c01	1351	209	358	2	51	51	112	1e-28	46/50	92	AP00287
105b04	1369	211	360	2	51	51	112	1e-28	46/50	92	AP00287
106d07	903	192	341	2	51	51	112	1e-28	46/50	92	AP00287
107f05	1052	202	351	2	51	51	112	1e-28	46/50	92	AP00287
123b031	958	114	266	1	51	51	113	1e-28	47/51	92	AP00286
145c08	945	206	355	2	51	51	112	1e-28	46/50	92	AP00287
149d04	1369	211	360	2	51	51	112	1e-28	46/50	92	AP00287
153e10	1376	215	364	2	51	51	112	1e-28	46/50	92	AP00287
162g04	965	209	358	2	51	51	112	1e-28	46/50	92	AP00287
164b08	1366	211	360	2	51	51	112	1e-28	46/50	92	AP00287
174e05	928	208	357	2	51	51	112	1e-28	46/50	92	AP00287
185d03	929	207	356	2	51	51	112	1e-28	46/50	92	AP00287
186c12	951	208	357	2	51	51	112	1e-28	46/50	92	AP00287
186f021	818	200	349	2	51	51	112	1e-28	46/50	92	AP00287
191h10	908	221	370	2	51	51	112	1e-28	46/50	92	AP00287
192b01	1413	214	363	2	51	51	112	1e-28	46/50	92	AP00287
206h01	1376	210	359	2	51	51	112	1e-28	46/50	92	AP00287
211b04	918	207	356	2	51	51	112	1e-28	46/50	92	AP00287
502h051	907	107	256	2	51	51	112	1e-28	46/50	92	AP00287
012c03	900	96	248	1	51	51	112	2e-28	46/51	90	AP00286
084f11	909	214	363	2	51	51	112	2e-28	46/50	92	AP00287
189a03	937	202	354	1	51	51	111	4e-28	46/51	90	AP00286
214c03	946	201	353	1	51	51	110	6e-28	45/51	88	AP00286
089h121	900	205	354	2	51	51	110	8e-28	45/50	90	AP00287
120e03	915	276	455	7	66	66	108	2e-27	43/60	71	AP00992
190f07	938	211	360	2	51	51	108	3e-27	45/50	90	AP00287
002h07	862	207	356	2	51	51	107	4e-27	45/50	90	AP00286
141f04	924	202	354	1	51	51	107	4e-27	44/51	86	AP00286
LSYContig1463	2044	213	359	3	51	51	105	3e-26	43/49	87	AP00286
LSYContig1406	1429	212	358	2	50	51	89	2e-24	37/49	75	AP00287
118f03	925	71	199	9	51	51	92.8	1e-22	38/43	88	AP00286
504f011	716	147	233	23	51	51	67	3e-22	26/29	89	AP00286
163d06	931	211	360	2	51	51	88.2	3e-21	37/50	74	AP00286
183a05	939	214	480	1	88	90	87.8	4e-21	43/89	48	AP01245
LSYContig1768	921	210	476	1	88	90	85.5	2e-20	40/89	44	AP01245
200a10	1346	215	481	1	88	90	84	6e-20	41/89	46	AP01245
177d12	1101	285	551	1	88	90	82.4	2e-19	40/90	44	AP01245
323g011	935	187	456	1	88	90	82	2e-19	40/91	43	AP01245
196g12	972	211	360	2	51	51	77	8e-18	33/50	66	AP00287
035h08	913	85	180	20	51	51	75.5	2e-17	30/32	93	AP00287
LSYContig1399	804	177	446	1	88	90	75.1	2e-17	38/91	41	AP01245
214b021	862	169	438	1	88	90	75.1	3e-17	38/91	41	AP01245
102b09	922	227	484	1	88	90	73.9	6e-17	38/88	43	AP01245
183d04	926	75	170	20	51	51	73.9	6e-17	29/32	90	AP00286
332b081	889	191	460	1	88	90	73.9	6e-17	38/91	41	AP01245
009g01	901	153	278	1	43	45	72.8	1e-16	28/43	65	AP00495
177e07	1053	99	191	21	51	51	72.4	2e-16	28/31	90	AP00286
206d08	1367	211	366	2	51	51	72	3e-16	32/52	61	AP00286
432e041	746	134	259	1	43	45	69.7	1e-15	27/43	62	AP00495
LSYContig1891	1054	185	400	1	76	90	69.7	1e-15	34/76	44	AP01245
186d111	764	76	165	22	51	51	67	8e-15	26/30	86	AP00287
244g121	847	125	271	1	48	51	66.6	9e-15	34/49	69	AP00489
152h071	782	152	328	5	63	63	65.1	3e-14	25/59	42	AP00991
442e121	799	144	290	1	48	51	64.3	4e-14	33/49	67	AP00489
310h121	760	132	278	1	48	51	64.3	5e-14	33/49	67	AP00489
314c071	657	332	481	5	54	63	63.9	6e-14	25/50	50	AP00991
204e031	995	167	406	1	78	90	62.4	2e-13	32/81	39	AP01245
336b011	855	159	305	1	48	51	62	2e-13	32/49	65	AP00489
211b02	920	210	368	2	51	51	61.6	3e-13	29/53	54	AP00286
126g06	905	207	365	2	51	51	61.2	4e-13	29/53	54	AP00286
188c051	819	204	362	2	51	51	61.2	4e-13	29/53	54	AP00286
LSYContig1331	619	207	365	2	51	51	61.2	4e-13	29/53	54	AP00286
266g011	895	130	276	1	48	51	60.8	5e-13	32/49	65	AP00489
199f01	939	210	368	2	51	51	59.7	1e-12	29/53	54	AP00286
LSYContig2713	795	166	273	13	48	51	58.9	2e-12	27/36	75	AP00489
175a02	1130	208	288	15	41	45	57.4	5e-12	20/27	74	AP00495
208a04	1157	202	282	15	41	45	57.4	5e-12	20/27	74	AP00495
LSYContig526	1258	184	264	15	41	45	57.4	6e-12	20/27	74	AP00495
LSYContig1732	725	181	315	4	48	51	57	8e-12	25/45	55	AP00489
106d091	680	139	213	26	50	51	48.1	1e-11	19/25	76	AP00287
192d10	1221	209	367	2	51	51	56.6	1e-11	28/53	52	AP00286
134e03	903	202	309	13	48	51	55.1	3e-11	25/36	69	AP00489
175a01	1159	219	326	13	48	51	55.1	3e-11	25/36	69	AP00489
305f111	902	172	306	4	48	51	55.1	3e-11	24/45	53	AP00489
LSYContig1675	752	214	321	13	48	51	55.1	3e-11	25/36	69	AP00489
LSYContig2043	1152	182	316	4	48	51	54.7	3e-11	24/45	53	AP00489
119f01	967	207	365	4	50	51	53.9	7e-11	32/53	60	AP00489
LSYContig92	899	224	322	16	48	51	53.5	9e-11	24/33	72	AP00489
027b03	899	167	271	1	41	41	52.4	2e-10	24/42	57	AP00270
314g041	898	239	331	21	51	51	52.4	2e-10	24/31	77	AP00489
023a08	1348	164	265	1	40	41	50.8	6e-10	23/41	56	AP00270
092g07	1305	175	276	1	40	41	50.8	6e-10	23/41	56	AP00270
098d02	1403	177	278	1	40	41	50.8	6e-10	23/41	56	AP00270
098d05	1381	191	292	1	40	41	50.8	6e-10	23/41	56	AP00270
098g10	1356	176	277	1	40	41	50.8	6e-10	23/41	56	AP00270
104h08	1433	177	278	1	40	41	50.8	6e-10	23/41	56	AP00270
105g03	1344	171	272	1	40	41	50.8	6e-10	23/41	56	AP00270
111g11	705	176	277	1	40	41	50.8	6e-10	23/41	56	AP00270
148e12	1332	170	271	1	40	41	50.8	6e-10	23/41	56	AP00270
149d07	1360	174	275	1	40	41	50.8	6e-10	23/41	56	AP00270
157e05	1354	178	279	1	40	41	50.8	6e-10	23/41	56	AP00270
193f031	795	164	274	13	49	51	50.4	6e-10	23/37	62	AP00489
202e08	1399	177	278	1	40	41	50.8	6e-10	23/41	56	AP00270
LSYContig192	2322	186	287	1	40	41	50.8	6e-10	23/41	56	AP00270
104a06	1374	183	272	12	40	41	50.1	1e-09	20/30	66	AP00270
211h12	912	199	297	16	48	51	50.1	1e-09	22/33	66	AP00489
LSYContig1688	1978	171	281	1	36	51	42.4	1e-09	23/37	62	AP00489
001d08	827	171	257	1	36	41	48.9	2e-09	20/36	55	AP00270
004g02	913	168	254	1	36	41	48.9	2e-09	20/36	55	AP00270
026a08	1354	173	259	1	36	41	48.9	2e-09	20/36	55	AP00270
028g04	867	179	265	1	36	41	48.9	2e-09	20/36	55	AP00270
066c101	1130	141	227	1	36	41	48.9	2e-09	20/36	55	AP00270
092c07	1214	176	262	1	36	41	48.9	2e-09	20/36	55	AP00270
096b01	1342	162	248	1	36	41	48.9	2e-09	20/36	55	AP00270
096h11	1297	163	249	1	36	41	48.9	2e-09	20/36	55	AP00270
104e06	1412	173	259	1	36	41	48.9	2e-09	20/36	55	AP00270
148b10	1329	171	257	1	36	41	48.9	2e-09	20/36	55	AP00270
148e08	1355	173	259	1	36	41	48.9	2e-09	20/36	55	AP00270
156e11	1380	176	262	1	36	41	48.9	2e-09	20/36	55	AP00270
156c09	1383	213	293	1	27	47	48.5	3e-09	20/27	74	AP01330
194e11	1425	216	296	1	27	47	48.5	3e-09	20/27	74	AP01330
138g11	912	270	344	12	36	41	47.8	5e-09	15/25	60	AP00270
231b041	929	263	352	19	48	51	47.8	5e-09	21/30	70	AP00489
003b07	867	182	244	9	29	30	47.4	6e-09	16/21	76	AP00912
004c12	882	181	243	9	29	30	47.4	6e-09	16/21	76	AP00912
018b01	925	187	249	9	29	30	47.4	6e-09	16/21	76	AP00912
025e02	1325	185	247	9	29	30	47.4	6e-09	16/21	76	AP00912
058b02	897	181	243	9	29	30	47.4	6e-09	16/21	76	AP00912
085c12	898	188	250	9	29	30	47.4	6e-09	16/21	76	AP00912
116a09	826	187	249	9	29	30	47.4	6e-09	16/21	76	AP00912
149g04	1206	188	250	9	29	30	47.4	6e-09	16/21	76	AP00912
150e08	1235	182	244	9	29	30	47.4	6e-09	16/21	76	AP00912
164g10	1327	186	248	9	29	30	47.4	6e-09	16/21	76	AP00912
175a03	1157	183	245	9	29	30	47.4	6e-09	16/21	76	AP00912
177a03	1249	185	247	9	29	30	47.4	6e-09	16/21	76	AP00912
194c01	1285	187	249	9	29	30	47.4	6e-09	16/21	76	AP00912
198e02	1301	185	247	9	29	30	47.4	6e-09	16/21	76	AP00912
LSYContig280	1220	186	248	9	29	30	47.4	6e-09	16/21	76	AP00912
003c081	992	183	245	9	29	30	47.4	7e-09	16/21	76	AP00912
022g03	1357	199	261	9	29	30	47.4	7e-09	16/21	76	AP00912
023h08	1384	190	252	9	29	30	47.4	7e-09	16/21	76	AP00912
024c08	1449	206	268	9	29	30	47.4	7e-09	16/21	76	AP00912
025b04	1380	187	249	9	29	30	47.4	7e-09	16/21	76	AP00912
025e05	1412	202	264	9	29	30	47.4	7e-09	16/21	76	AP00912
025g05	1382	188	250	9	29	30	47.4	7e-09	16/21	76	AP00912
026f04	1409	201	263	9	29	30	47.4	7e-09	16/21	76	AP00912
026g07	1412	187	249	9	29	30	47.4	7e-09	16/21	76	AP00912
042g06	1374	201	263	9	29	30	47.4	7e-09	16/21	76	AP00912
046f06	1377	189	251	9	29	30	47.4	7e-09	16/21	76	AP00912
063d09	783	187	249	9	29	30	47.4	7e-09	16/21	76	AP00912
087a05	1452	187	249	9	29	30	47.4	7e-09	16/21	76	AP00912
092d05	1358	185	247	9	29	30	47.4	7e-09	16/21	76	AP00912
092d07	1451	201	263	9	29	30	47.4	7e-09	16/21	76	AP00912
092h12	1388	188	250	9	29	30	47.4	7e-09	16/21	76	AP00912
096h02	1412	202	264	9	29	30	47.4	7e-09	16/21	76	AP00912
098d06	1356	186	248	9	29	30	47.4	7e-09	16/21	76	AP00912
098d10	1367	186	248	9	29	30	47.4	7e-09	16/21	76	AP00912
098g02	1392	183	245	9	29	30	47.4	7e-09	16/21	76	AP00912
100a05	1373	203	265	9	29	30	47.4	7e-09	16/21	76	AP00912
100c06	1435	187	249	9	29	30	47.4	7e-09	16/21	76	AP00912
100d10	1410	185	247	9	29	30	47.4	7e-09	16/21	76	AP00912
103f11	1398	187	249	9	29	30	47.4	7e-09	16/21	76	AP00912
103h01	1372	188	250	9	29	30	47.4	7e-09	16/21	76	AP00912
105e07	1353	190	252	9	29	30	47.4	7e-09	16/21	76	AP00912
105e08	1340	187	249	9	29	30	47.4	7e-09	16/21	76	AP00912
114g10	775	187	249	9	29	30	47.4	7e-09	16/21	76	AP00912
149h12	1364	201	263	9	29	30	47.4	7e-09	16/21	76	AP00912
206c06	1374	184	246	9	29	30	47.4	7e-09	16/21	76	AP00912
LSYContig1055	933	188	250	9	29	30	47.4	7e-09	16/21	76	AP00912
LSYContig739	1359	197	259	9	29	30	47.4	7e-09	16/21	76	AP00912
169b03	1311	174	263	1	37	41	47	8e-09	18/37	48	AP00270
098e05	1333	171	275	1	41	41	46.6	1e-08	21/42	50	AP00270
105b03	1400	172	261	1	37	41	46.6	1e-08	21/37	56	AP00270
168d11	1310	161	265	1	41	41	46.6	1e-08	21/42	50	AP00270
329b041	722	163	294	1	43	51	46.2	1e-08	25/44	56	AP00489
346f091	602	315	461	35	81	90	36.6	1e-08	20/49	40	AP01245
LSYContig242	905	174	278	1	41	41	46.6	1e-08	21/42	50	AP00270
011e08	828	336	428	12	41	41	45.4	2e-08	19/31	61	AP00270
159f11	927	212	295	21	48	51	45.1	3e-08	20/28	71	AP00489
103e04	1374	185	247	9	29	30	44.7	4e-08	15/21	71	AP00912
201f011	865	206	343	2	44	51	44.7	4e-08	23/46	50	AP00286
100a02	1293	167	256	1	37	41	44.3	5e-08	18/37	48	AP00270
105b09	1321	185	247	9	29	30	44.3	5e-08	15/21	71	AP00912
150f07	1266	170	259	1	37	41	44.3	5e-08	18/37	48	AP00270
151d06	1301	170	259	1	37	41	44.3	5e-08	18/37	48	AP00270
164b05	1323	171	260	1	37	41	44.3	5e-08	18/37	48	AP00270
164b09	1279	175	264	1	37	41	44.3	5e-08	18/37	48	AP00270
168h07	1276	171	260	1	37	41	44.3	5e-08	18/37	48	AP00270
169a04	1273	169	258	1	37	41	44.3	5e-08	18/37	48	AP00270
169g08	1254	170	259	1	37	41	44.3	5e-08	18/37	48	AP00270
177e05	1164	170	259	1	37	41	44.3	5e-08	18/37	48	AP00270
195b12	1294	173	262	1	37	41	44.3	5e-08	18/37	48	AP00270
198d02	1328	169	258	1	37	41	44.3	5e-08	18/37	48	AP00270
202a10	1302	171	260	1	37	41	44.3	5e-08	18/37	48	AP00270
204a01	1281	171	260	1	37	41	44.3	5e-08	18/37	48	AP00270
206f07	1204	173	262	1	37	41	44.3	5e-08	18/37	48	AP00270
152f06	938	168	257	1	37	41	44.3	6e-08	18/37	48	AP00270
156c08	1359	174	263	1	37	41	44.3	6e-08	18/37	48	AP00270
164a07	1357	164	253	1	37	41	44.3	6e-08	18/37	48	AP00270
170a08	1356	170	259	1	37	41	44.3	6e-08	18/37	48	AP00270
198c05	1352	162	251	1	37	41	44.3	6e-08	18/37	48	AP00270
204e06	1417	171	260	1	37	41	44.3	6e-08	18/37	48	AP00270
206a08	1399	171	260	1	37	41	44.3	6e-08	18/37	48	AP00270
207c02	1401	168	257	1	37	41	44.3	6e-08	18/37	48	AP00270
209e11	1343	170	259	1	37	41	44.3	6e-08	18/37	48	AP00270
209h04	1433	169	258	1	37	41	44.3	6e-08	18/37	48	AP00270
LSYContig262	1972	178	267	1	37	41	44.3	8e-08	18/37	48	AP00270
046b09	1299	203	280	12	37	41	43.5	9e-08	15/26	57	AP00270
160h08	1315	231	308	23	48	51	43.5	9e-08	19/26	73	AP00489
201g02	920	209	286	23	48	51	43.5	9e-08	19/26	73	AP00489
LSYContig1413	917	232	309	23	48	51	43.5	9e-08	19/26	73	AP00489
206f06	1385	174	263	1	37	41	43.1	1e-07	18/37	48	AP00270
207f05	994	268	345	23	48	51	42.7	2e-07	19/26	73	AP00489
LSYContig1719	948	296	373	23	48	51	42.7	2e-07	19/26	73	AP00489
012d031	730	242	319	26	51	51	41.6	4e-07	18/26	69	AP00489
259h031	844	210	287	23	48	51	41.2	4e-07	18/26	69	AP00489
105b07	1345	1008	1202	20	76	79	41.2	5e-07	26/67	38	AP00690
183c07	971	202	279	23	48	51	41.2	5e-07	18/26	69	AP00489
198a02	1296	212	289	23	48	51	41.2	5e-07	18/26	69	AP00489
LSYContig1510	1383	384	599	4	75	78	41.2	5e-07	20/73	27	AP01340
LSYContig2243	779	213	290	23	48	51	41.2	5e-07	18/26	69	AP00489
083e101	551	194	340	2	46	51	40.8	6e-07	23/49	46	AP00286
335d011	379	310	170	22	67	79	38.5	3e-06	23/48	47	AP00690
065c06	904	204	347	4	51	51	38.1	4e-06	19/48	39	AP00489
214c05	974	894	823	15	38	43	37.4	7e-06	15/24	62	AP00009
196f02	1119	316	396	62	88	90	29.3	9e-06	13/27	48	AP01245
209f05	1070	179	238	32	51	51	32.7	9e-06	14/20	70	AP00489
074h08	850	450	238	9	67	79	36.2	1e-05	27/71	38	AP00689

## Sheet: Sheet3
unigene name	Letter	QueryX	QueryY	SbjctX	SbjctY	Length	Score	E value	Overlap/total	Identity	Sbject Name
lucyHOContig6289	231	7	144	20	63	63	89.4	1e-21	37/46	80	AP00991
lucyHOContig3833	602	211	399	2	63	63	87.8	4e-21	41/63	65	AP00991
lucyHOContig325	666	182	325	1	47	47	79.7	1e-18	34/48	70	AP01330
lucyHOContig2089	249	30	140	30	66	66	75.9	1e-17	29/37	78	AP00992
lucyHOContig1529	703	180	437	1	88	90	73.9	6e-17	38/88	43	AP01245
lucyHOContig5156	342	131	3	4	45	63	70.5	6e-16	29/43	67	AP00991
lucyHOContig3029	302	253	11	1	78	90	62.8	1e-13	32/82	39	AP01245
lucyHOContig5515	395	136	279	4	51	51	62	2e-13	27/48	56	AP00489
ESJ62MF02EURHW	222	33	134	30	63	63	56.6	9e-12	21/34	61	AP00991
lucyHOContig2078	467	40	180	1	47	47	56.2	1e-11	23/47	48	AP01330
lucyHOContig29	697	32	163	4	48	51	55.8	2e-11	27/45	60	AP00489
lucyHOContig5072	593	163	270	13	48	51	55.1	3e-11	25/36	69	AP00489
ESJ62MF02EZE38	254	219	61	4	50	51	53.9	6e-11	32/53	60	AP00489
lucyHOContig1753	286	249	181	35	57	63	51.6	3e-10	20/23	86	AP00991
lucyHOContig4350	318	205	107	16	48	51	50.1	9e-10	22/33	66	AP00489
lucyHOContig6213	293	121	246	31	71	90	43.5	2e-08	22/42	52	AP01245
ETFO4QO02DJP8D	299	124	44	23	49	51	44.3	5e-08	20/27	74	AP00489
ETFO4QO02D7O0Q	225	154	222	20	42	51	37	8e-06	16/23	69	AP00489
lucyHOContig2797	415	53	136	24	50	51	36.2	1e-05	19/28	67	AP00489

## Sheet: Sheet4
unigene name	Letter	QueryX	QueryY	SbjctX	SbjctY	Length	Score	E value	Overlap/total	Identity	Sbject Name
lucyLOContig2249	466	19	138	27	66	66	76.6	9e-18	30/40	75	AP00992
lucyLOContig359	295	45	167	24	63	63	76.6	9e-18	32/41	78	AP00991
lucyLOContig801	337	29	139	30	66	66	75.1	3e-17	29/37	78	AP00992
lucyLOContig1603	406	182	406	1	76	90	72.8	1e-16	35/76	46	AP01245
lucyLOContig268	230	190	38	8	58	63	64.3	4e-14	25/51	49	AP00991
lucyLOContig1007	376	180	314	1	44	46	62	2e-13	29/45	64	AP01277
lucyLOContig3985	394	177	335	1	54	90	56.6	9e-12	26/54	48	AP01245
lucyLOContig4066	255	37	180	2	48	51	53.5	8e-11	27/48	56	AP00489
lucyLOContig428	335	236	144	16	46	51	45.8	2e-08	20/31	64	AP00489
lucyLOContig1512	532	30	194	32	88	90	45.1	3e-08	24/57	42	AP01245
ESJ62MF04J2T7Z	74	19	69	27	43	66	40.4	6e-07	15/17	88	AP00992
